# Supplementary material for: Bond-bending isomerism of Au2I3−: competition between covalent bonding and aurophilicity
Source: Royal Society of Chemistry journal article supplement (doi:10.1039/c5sc03568f), 2015-10-13
Supplement: c5sc03568f1.pdf [file c5sc03568f1.pdf]

Supporting Information for

## **Bond-Bending Isomerism of Au<sub>2</sub>I<sub>3</sub><sup>-</sup>: Competition between Covalent Bonding and Auophilicity**

Wan-Lu Li,<sup>a</sup> Hong-Tao Liu,<sup>b</sup> Tian Jian,<sup>c</sup> Gary V. Lopez,<sup>c</sup> Zachary A. Piazza,<sup>c</sup> Dao-Ling Huang,<sup>c</sup> Teng-Teng Chen,<sup>c</sup> Jing Su,<sup>a,b</sup> Ping Yang,<sup>d</sup> Xin Chen,<sup>a</sup> Lai-Sheng Wang,<sup>\*c</sup> and Jun Li<sup>\*a</sup>

<sup>a</sup> Department of Chemistry & Key Laboratory of Organic Optoelectronics and Molecular Engineering of Ministry of Education, Tsinghua University, Beijing 100084, China.

<sup>b</sup> Shanghai Institute of Applied Physics, Chinese Academy of Sciences, Shanghai 201800, China

<sup>c</sup> Department of Chemistry, Brown University, Providence, Rhode Island 02912, USA.

<sup>d</sup> Theoretical Division T-1, Los Alamos National Laboratory, Los Alamos, NM 87544, USA.

\*E-mail: Lai-Sheng\_Wang@brown.edu; junli@tsinghua.edu.cn

### **Contents**

|                                                                                                           |    |
|-----------------------------------------------------------------------------------------------------------|----|
| Table S1. Experimental VDEs of Au <sub>2</sub> I <sub>3</sub> <sup>-</sup> compared with theoretical VDEs | S2 |
| Table S2. Structural parameters of the acute (A) and obtuse (O) isomers                                   | S3 |
| Table S3. The energy difference between the two isomers and auophilic interaction energies                | S3 |
| Table S4. bond orders and local adiabatic stretching force constant                                       | S3 |
| Figure S1. Potential energy curves for the isomerization at different levels of theory                    | S4 |
| Figure S2. The occupied molecular orbital contours of the acute isomer                                    | S4 |
| Figure S3. The occupied molecular orbital contours of the obtuse isomer                                   | S5 |
| Figure S4. Orbital energy-level correlation diagram for the occupied MOs                                  | S5 |
| Figure S5. AdNDP bonding analyses for the obtuse and acute structures                                     | S6 |
| References                                                                                                | S6 |

**Table S1.** Experimental VDEs of  $\text{Au}_2\text{I}_3^-$  compared with theoretical VDEs, calculated with the CASSCF/CCSD(T)/SO method for structures with different bending angles. All energies are in eV.

| Features <sup>[a]</sup> | Exp.<br>VDEs <sup>[b]</sup> | Theo. VDEs <sup>[c]</sup> |       |       |       |       |       |                       |
|-------------------------|-----------------------------|---------------------------|-------|-------|-------|-------|-------|-----------------------|
|                         |                             | 100.7°(O) <sup>[d]</sup>  | 90°   | 85°   | 81°   | 78°   | 75°   | 72°(A) <sup>[e]</sup> |
| X'                      | 4.86(5)                     |                           | 5.015 | 4.977 | 4.938 | 4.905 | 4.868 | 4.828                 |
| A'                      | 5.00(5)                     |                           | 5.184 | 5.156 | 5.134 | 5.117 | 5.101 | 5.087                 |
| X                       | 5.16(4)                     | 5.073                     |       |       |       |       |       |                       |
| A                       | 5.34(3)                     | 5.343                     |       |       |       |       |       |                       |
| B'                      | 5.45(5)                     |                           |       |       |       | 5.480 | 5.454 | 5.431                 |
| C'                      | 5.51(5)                     |                           | 5.574 | 5.538 | 5.505 |       |       |                       |
| D'                      | 5.63(5)                     |                           | 5.804 | 5.772 | 5.746 | 5.727 | 5.710 | 5.689                 |
| B                       | 5.74(3)                     | 5.736                     |       |       |       |       |       |                       |
| E'                      | ~5.9                        |                           |       | 6.187 | 6.141 | 6.098 | 6.048 | 5.907                 |
| C                       | 6.03(3)                     | 5.869                     |       |       |       |       |       |                       |
| F'                      | ~6.2                        |                           | 6.228 | 6.343 | 6.309 | 6.279 | 6.250 | 6.278                 |
| D                       | 6.37(5)                     | 6.277                     | 6.384 |       |       |       |       |                       |
| E                       | 6.55(5)                     | 6.443                     | 6.486 | 6.462 | 6.446 | 6.430 | 6.415 | 6.532                 |
| F                       | 6.67(5)                     | 6.531                     | 6.691 | 6.693 | 6.701 | 6.706 | 6.713 | 6.649                 |
| G                       | 6.91(5)                     | 6.702                     | 7.094 | 7.079 | 7.070 | 7.058 | 7.036 | 7.016                 |
| H                       | 7.21(5)                     | 7.124                     | 7.171 | 7.130 | 7.097 | 7.073 | 7.062 | 7.023                 |
| I                       | 7.39(5)                     | 7.246                     | 7.265 | 7.257 | 7.255 | 7.262 | 7.273 | 7.294                 |
|                         |                             | 7.298                     |       |       |       |       |       |                       |

[a] X, A, B, C and X', A', B', C', D', E', F' are measured from the 193 nm spectra; D, E, F, G, H and I are measured from the 157 nm spectrum.

[b] The number in the parentheses indicates the uncertainty in the last digit.

[c] Theoretical VDEs with bending angles ranging from the acute to the obtuse. Geometries are optimized at CCSD(T)/AVTZ level with the fixed bending angles.

[d] Obtuse structure with 100.7° bending angle.

[e] Acute structure with 72.0° bending angle.

**Table S2.** Structural parameters of the acute (A) and obtuse (O) isomers of  $\text{Au}_2\text{I}_3^-$  at different levels of theory.

|                         | Method    | $\text{Au}_1\text{-Au}_2$ (Å) |      | $\text{Au}_1\text{-I}^c$ (Å) |      | $\text{Au}_1\text{-I}_1^t$ (Å) |      | $\text{Au}_1\text{-I}^c\text{-Au}_2$ (°) |       | $\text{I}^c\text{-Au}_2\text{-I}_2^t$ (°) |       |
|-------------------------|-----------|-------------------------------|------|------------------------------|------|--------------------------------|------|------------------------------------------|-------|-------------------------------------------|-------|
|                         |           | A                             | O    | A                            | O    | A                              | O    | A                                        | O     | A                                         | O     |
| Post-HF                 | CCSD(T)   | 3.08                          | 3.99 | 2.62                         | 2.59 | 2.56                           | 2.56 | 72.0                                     | 100.7 | 174.9                                     | 177.5 |
|                         | SCS-MP2   | 3.03                          | 3.92 | 2.60                         | 2.57 | 2.54                           | 2.54 | 71.3                                     | 99.2  | 175.2                                     | 177.7 |
| GGA                     | PBE       | 2.99                          | 4.17 | 2.64                         | 2.60 | 2.58                           | 2.57 | 69.0                                     | 106.3 | 172.8                                     | 176.9 |
|                         | PW91      | 2.98                          | 4.16 | 2.64                         | 2.60 | 2.58                           | 2.57 | 68.7                                     | 106.2 | 172.8                                     | 176.9 |
| Hybrid-GGA              | B3LYP     | -                             | 4.22 | -                            | 2.63 | -                              | 2.59 | -                                        | 106.6 | -                                         | 176.9 |
| Meta-GGA                | TPSS      | 2.90                          | 4.18 | 2.64                         | 2.60 | 2.57                           | 2.57 | 66.5                                     | 106.8 | 171.4                                     | 176.9 |
| Hybrid-Meta<br>-GGA     | TPSSh     | 2.94                          | 4.15 | 2.63                         | 2.60 | 2.57                           | 2.56 | 67.8                                     | 106.2 | 172.3                                     | 177.0 |
| Long-range<br>corrected | CAM-B3LYP | -                             | 4.15 | -                            | 2.61 | -                              | 2.57 | -                                        | 105.5 | -                                         | 177.2 |
|                         | LC-PBE    | 3.03                          | 3.98 | 2.55                         | 2.53 | 2.51                           | 2.51 | 73.1                                     | 103.8 | 175.0                                     | 177.5 |
|                         | LC-PW91   | 3.06                          | 3.99 | 2.55                         | 2.53 | 2.51                           | 2.51 | 73.9                                     | 103.9 | 175.3                                     | 177.5 |

**Table S3.** The energy difference between the acute and obtuse isomers of  $\text{Au}_2\text{I}_3^-$  and aurophilic interaction energies calculated at various levels of theory. All energies in kJ/mol are corrected for zero-point energies (ZPE).<sup>[a]</sup>

|                                        | CCSD(T) | SCS-MP2 | PBE   | PW91  | LC-PBE | LC-PW91 | TPSS  | TPSSh |
|----------------------------------------|---------|---------|-------|-------|--------|---------|-------|-------|
| $E_a$ <sup>[b]</sup>                   | 0.25    | 0.29    | 0.33  | 0.42  | 0.08   | 0.08    | 2.76  | 1.55  |
| $E_{\text{AI}}$ <sup>[c]</sup>         | 49.20   | 53.63   | 45.69 | 45.94 | 51.00  | 50.58   | 47.23 | 45.69 |
| $\Delta E_{\text{A-O}}$ <sup>[d]</sup> | 1.78    | 1.10    | 5.02  | 4.77  | 3.34   | 3.51    | 1.21  | 2.38  |

[a] ZPE values of CCSD(T) and SCS-MP2 methods are estimated from TPSSh/AVTZ results.

[b] Activation energies from the acute structure to obtuse structure.

[c] The aurophilic interaction (AI) energy calculated by the energy of the linear  $\text{Au}_2\text{I}_3^-$  minus the acute one.

[d] The energy difference between the acute and obtuse isomers.

**Table S4.** Calculated bond orders and local adiabatic stretching force constant between Au and I in both stable acute and obtuse conformers.

|                            | Structure | Mayer <sup>1</sup> | G-J <sup>2</sup> | N-M <sub>(1)</sub> <sup>3,4</sup> | N-M <sub>(2)</sub> | N-M <sub>(3)</sub> | Force const.<br>(mDyn/Å) | Freq.<br>(cm <sup>-1</sup> ) |
|----------------------------|-----------|--------------------|------------------|-----------------------------------|--------------------|--------------------|--------------------------|------------------------------|
| $\text{Au}_1\text{-I}^c$   | Acute     | 0.67               | 0.43             | 0.50                              | 0.53               | 0.53               | 0.900                    | 140.7                        |
|                            | Obtuse    | 0.74               | 0.47             | 0.55                              | 0.57               | 0.57               | 1.218                    | 163.7                        |
| $\text{Au}_1\text{-I}_1^t$ | Acute     | 0.88               | 0.62             | 0.85                              | 0.83               | 1.00               | 1.480                    | 180.4                        |
|                            | Obtuse    | 0.88               | 0.62             | 0.87                              | 0.84               | 1.03               | 1.506                    | 182.0                        |
| $\text{Au}_1\text{-Au}_2$  | Acute     | 0.22               | 0.11             | 0.11                              | 0.09               | 0.10               | 0.084                    | 38.1                         |
|                            | Obtuse    | 0.02               | 0.03             | 0.03                              | 0.01               | 0.02               | 0.064                    | 33.2                         |

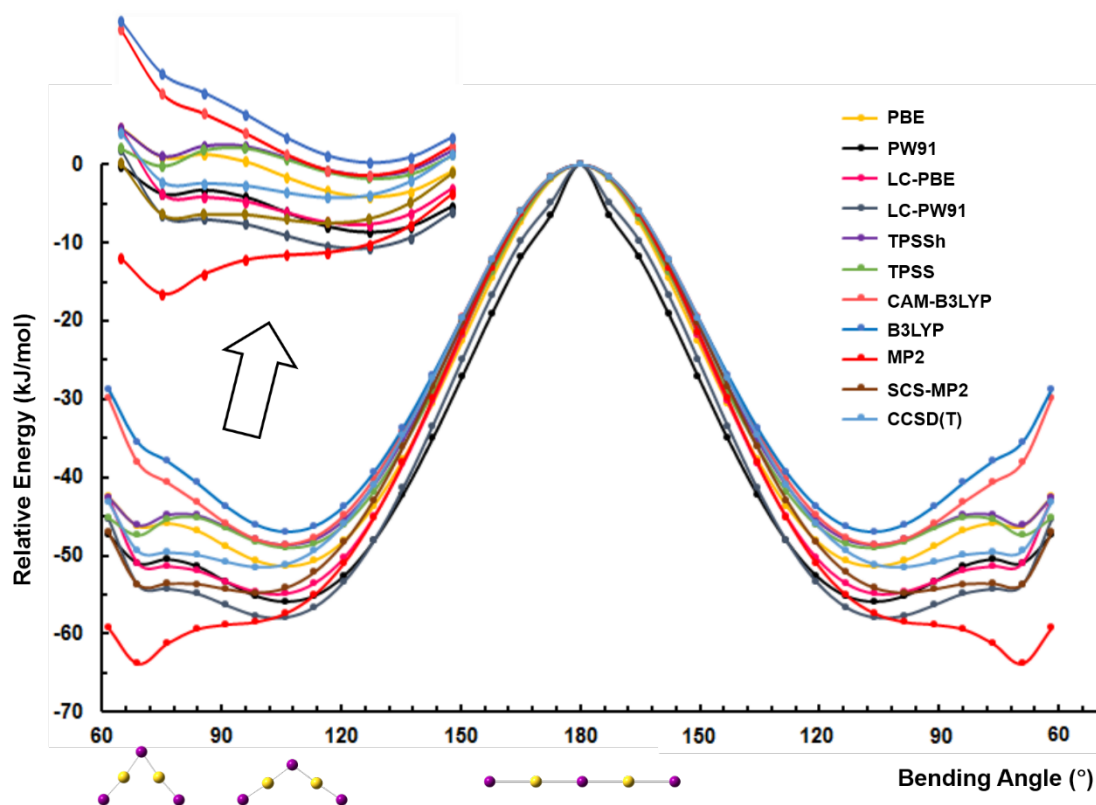

**Figure S1.** Potential energy curves of  $\text{Au}_2\text{I}_3^-$  as a function of the bond angle at different levels of theory. All the geometries are obtained by full optimization at each bending angle. Single-point energies for the CCSD(T) and SCS-MP2 methods are carried out using the structures optimized at the TPSSh/AVTZ level.

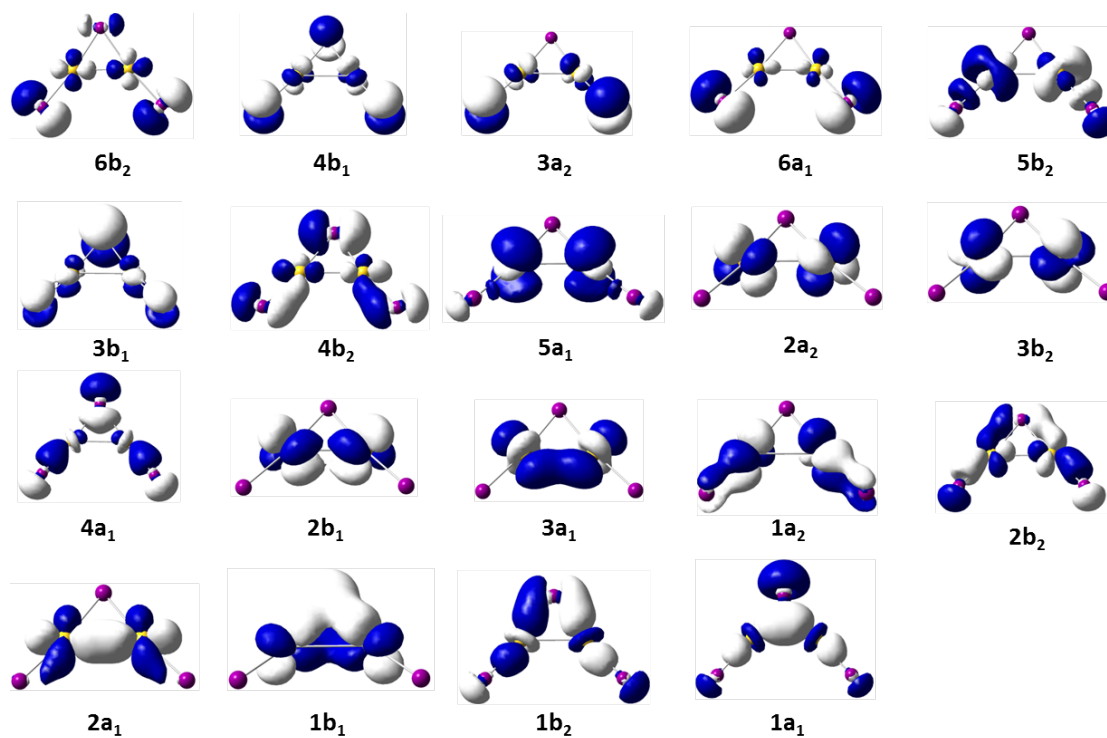

**Figure S2.** The occupied MO contours of the acute  $\text{Au}_2\text{I}_3^-$  isomer at the PBE/TZ2P level.

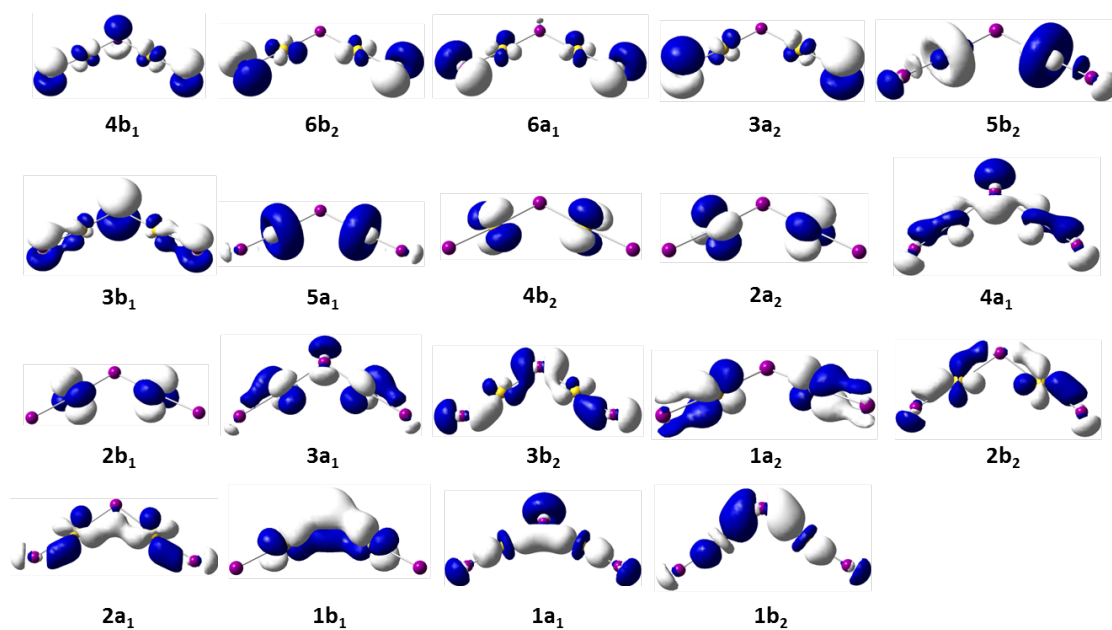

**Figure S3.** The occupied MO contours of the obtuse  $\text{Au}_2\text{I}_3^-$  isomer at the PBE/TZ2P level.

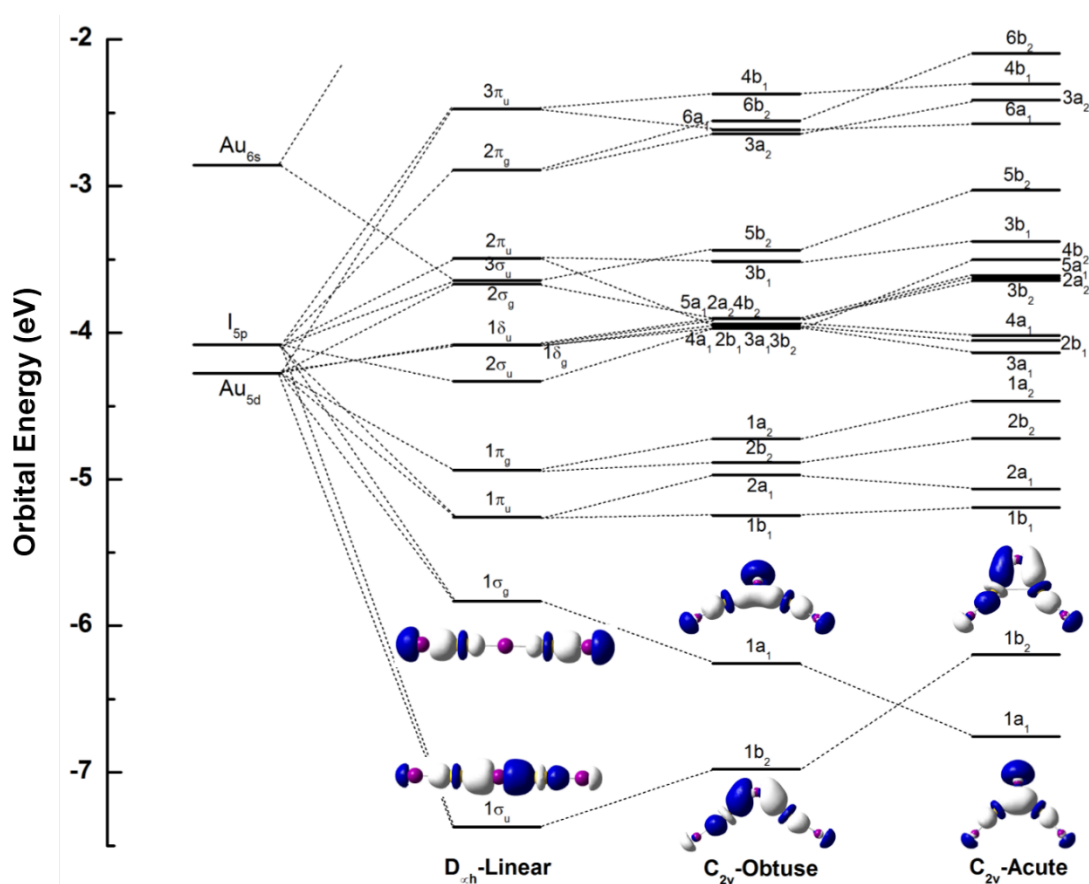

**Figure S4.** Orbital energy-level correlation diagram for the occupied MOs of the two BBI minima and at the linear transition state. The I-5p atomic orbital level is shifted to align with the  $1\delta_u$  nonbonding orbital.

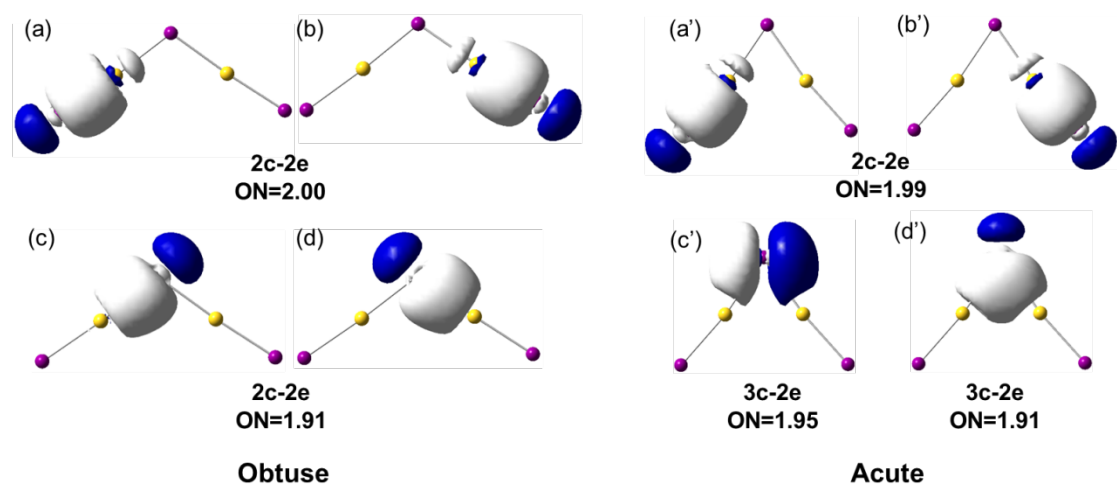

**Figure S5.** Results of the adaptive natural density partitioning (AdNDP) analyses for the obtuse and acute structures (Isosurface value = 0.04). ON = occupation number.

### References:

- 1 I. Mayer, *Chem. Phys. Lett.*, 1983, **97**, 270-274.
- 2 M. Gopinathan and K. Jug, *Theor. Chim. Acta*, 1983, **63**, 497-509.
- 3 A. Michalak, R. L. DeKock and T. Ziegler, *J. Phys. Chem. A*, 2008, **112**, 7256-7263.
- 4 R. F. Nalewajski, J. Mrozek and A. Michalak, *Int. J. Quantum Chem.*, 1997, **61**, 589-601.
